# Supplementary material for: Exquisitely constructing hierarchical carbon nanoarchitectures decorated with sulfides for high-performance Li–S batteries
Source: Royal Society of Chemistry journal article supplement (doi:10.1039/d3dt04163h), 2024-01-01
Supplement: d3dt04163h1.pdf [file d3dt04163h1.pdf]

## **Supporting information**

**Exquisitely Constructing Hierarchical Carbon Nanoarchitecture**

**Decorating with Sulfides for High-Performance Li-S Batteries**

## Experimental Section

### Materials

Carbon nanotubes (CNTs) (C822928, 95%); cobalt hexahydrate nitrate  $\text{Co}(\text{NO}_3)_2 \cdot 6\text{H}_2\text{O}$  (CAS No: 10026-22-9, 99.99%) and  $\text{Na}_2\text{MoO}_4 \cdot 2\text{H}_2\text{O}$  (CAS No: 10102-40-6, 99.99%) were purchased from the Chinese Academy of Science. 2-Methylimidazole (CAS No: 693-98-1, 98%); Polyvinylpyrrolidone (PVP) (CAS No: 9003-39-8, 99%);  $\text{C}_2\text{H}_5\text{NB}$  (CAS No: 62-55-5, 99%) and sublimed sulfur (S) (CAS No: 7704-34-9, 99.95%) were purchased from Aladdin Co. Ltd. Ketjen black (KB) (ECP-600JD, 98%); Carbon black (super P) (MA-EN-CO-010212);  $\text{Li}_2\text{S}$  (MA-EN-EL-50016A, 99.99%); 1,3 dioxolane (DOL) (CAS No: 646-06-0, 99.95%); 1,2 dimethoxyethane (DME) (CAS No: 110-71-4, 99.95%); bistrifluoromethane sulfonimide lithium salt (LiTFSI) (CAS No: 90076-65-6, 99.9%); Lithium nitrate ( $\text{LiNO}_3$ ) (CAS No: 7790-69-4, 99.9%); N-methyl-2-pyrrolidone (NMP) (CAS No: 872-50-4, 99.9%) and polyvinylidene fluoride (PVDF) (MA-EN-BI-01, 99.95%) were purchased from Guangdong Canrd New Energy Technology Co. Ltd. All chemicals were used as received without further purification.

### Preparation modified separators

The modified separators were prepared by uniformly materials (90 wt%) and PVDF (10 wt%) in NMP. The obtained suspension was evenly dispersed by ultrasound, filtered by vacuum on a commercial polypropylene (PP) separator and vacuum drying at 60 °C for 12 h.

### Visualized adsorption experiment of Lithium Polysulfides

The  $\text{Li}_2\text{S}_6$  solution was prepared by mixing sulfur and  $\text{Li}_2\text{S}$  in a 5:1 molar ratio and adding them to a mixed solution of DOL/DME (1:1, v/v). The mixed solution was then kept under an Ar atmosphere with stirring at 60 °C to produce a  $\text{Li}_2\text{S}_6$  solution (5 mM).

Subsequently, 10 mg each of CoS<sub>2</sub>-NC-CNTs@MoS<sub>2</sub>, CoS<sub>2</sub>-NC-CNTs and MoS<sub>2</sub>@CNTs powders were immersed in the as-prepared Li<sub>2</sub>S<sub>6</sub> solution (1.0 mL), and the discoloration of the solution was recorded.

### **Cell measurements**

Working electrodes were fabricated by coating different samples (CoS<sub>2</sub>-NC-CNTs@MoS<sub>2</sub>, CoS<sub>2</sub>-NC-CNTs and MoS<sub>2</sub>@CNTs) onto the carbon paper (CP) (the mass loading of active material is ca. 1 mg cm<sup>-2</sup>), and Celgard 2500 PP separators were sandwiched between two working electrodes. The electrolyte consisted of a 0.1 M Li<sub>2</sub>S<sub>6</sub> (20 μL) solution of DOL and DME (1:1 v/v). Cyclic voltammetry (CV) tests were performed on a VMP3 multichannel electrochemical workstation (Bio Logic, France) at various scan rates within a voltage window from -1.0 to 1.0 V.

A CR2025-type coin battery was assembled using C/S as the cathode, original PP or modified PP as the separator, Li sheet as the anode and a blank Li-S electrolyte containing 2 wt% LiNO<sub>3</sub> was added. The typical sulfur areal mass loading was approximately 1 mg cm<sup>-2</sup>, and the electrolyte/sulfur ratio was 20 μL/mg. A cathode with a high sulfur loading was also prepared and tested. CV and electrochemical impedance spectroscopy (EIS) measurements were performed on a VMP3 multichannel electrochemical workstation (Bio Logic, France). Galvanostatic charge-discharge (GCD) tests were performed on the LAND battery test system over a range of 1.7-2.8 voltage.

### **Li<sub>2</sub>S nucleation test**

The Li<sub>2</sub>S<sub>8</sub> solution was prepared by mixing sulfur and Li<sub>2</sub>S in a 7:1 molar ratio and adding them to a mixed solution of DOL/DME (1:1, v/v). Experiments were performed

using CoS<sub>2</sub>-NC-CNTs@MoS<sub>2</sub> (CoS<sub>2</sub>-NC-CNTs or CP) as the working electrode, and Li sheet was used as the counter electrode with PP separators. 20 μL Li<sub>2</sub>S<sub>8</sub> was added to the cathode side as the electrolyte, and 20 μL blank Li-S electrolyte containing 2 wt% LiNO<sub>3</sub> was applied on the other side. The cell was discharged to 2.06 V, and then the voltage was held at 2.05 V to nucleate Li<sub>2</sub>S.

### **Preparation of the C/S positive electrode**

To prepare the C/S positive electrode, KB and S in a mass ratio of 3:7 were thoroughly ground for 30 min and then heated at 155 °C for 12 h to melt the S. Subsequently, the cooled C/S composites, Super P and PVDF (8:1:1 mass ratio) were placed in a small amount of NMP, homogeneously dispersed using ultrasound, coated on aluminum foil and dried in a vacuum at 60 °C overnight before use. In addition, cathodes containing 3.8, 4.9 and 7.2 mg cm<sup>-2</sup> of sulfur were prepared.

### **Measurement of the galvanostatic intermittent titration technique (GITT)**

A protocol of a current pulse at 0.1 C for 40 min with 10 min of rest was used. The internal resistance could be quantified by the following relation equation:

$$IR (\Omega) = |\Delta V_{QOCV} - \Delta V_{CCV}| / I_{\text{applied}}$$

where  $\Delta V_{QOCV-CCV}$  is the voltage difference between the points of quasiopen-circuit voltage (QOCV) and closed-circuit voltage (CCV), and  $I_{\text{applied}}$  is the applied current.

### **Materials characterization**

The X-ray diffraction (XRD) measurements were performed on a Rigaku D/max2600 X-ray diffractometer. The morphology and microstructure of the materials were observed by scanning electron microscopy (SEM, SU70, Hitachi, Japan) and

transmission electron microscopy (TEM, FEI, Tecnai TF20). X-ray photoelectron spectra (XPS, Thermo ESCALAB 250Xi) of the materials were obtained to analyze the elemental contents and valence.

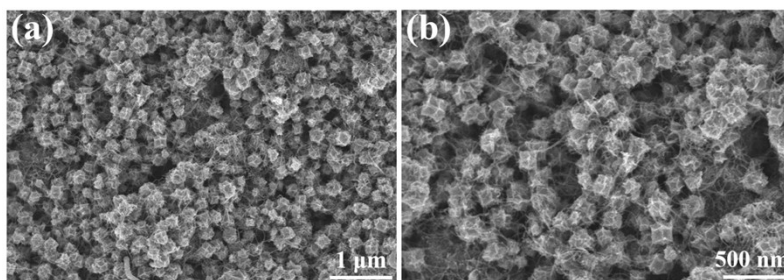

**Fig. S1.** (a, b) Low and high-magnification SEM images of CoS<sub>2</sub>-NC-CNTs.

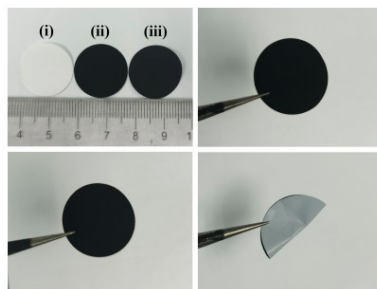

**Fig. S2.** Digital photography of the (i) PP, (ii)  $\text{CoS}_2\text{-NC-CNTs-PP}$  (iii)  $\text{CoS}_2\text{-NC-CNTs@MoS}_2\text{-PP}$  separators, and  $\text{CoS}_2\text{-NC-CNTs@MoS}_2\text{-PP}$  separator under bending and folding.

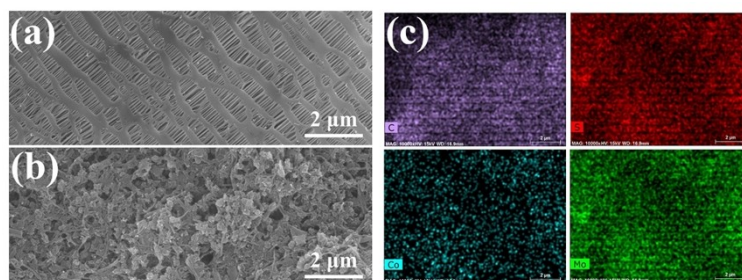

**Fig. S3.** (a, b) SEM images of the PP and CoS<sub>2</sub>-NC-CNTs@MoS<sub>2</sub>-PP separators. (c) EDS mapping imagery of the CoS<sub>2</sub>-NC-CNTs@MoS<sub>2</sub>-PP separator.



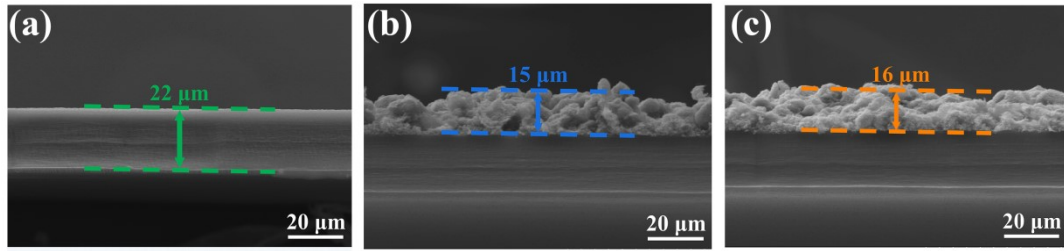

**Fig. S4.** (a–c) cross-sectional SEM images of the PP, CoS<sub>2</sub>-NC-CNTs-PP and CoS<sub>2</sub>-NC-CNTs@MoS<sub>2</sub>-PP separators.

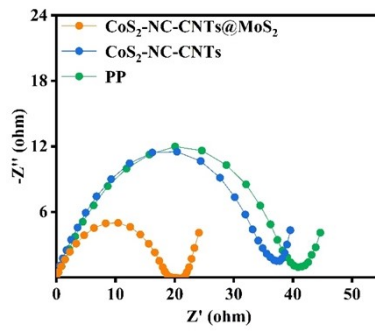

**Fig. S5.** *EIS* spectra of the developed materials in a symmetric cell.

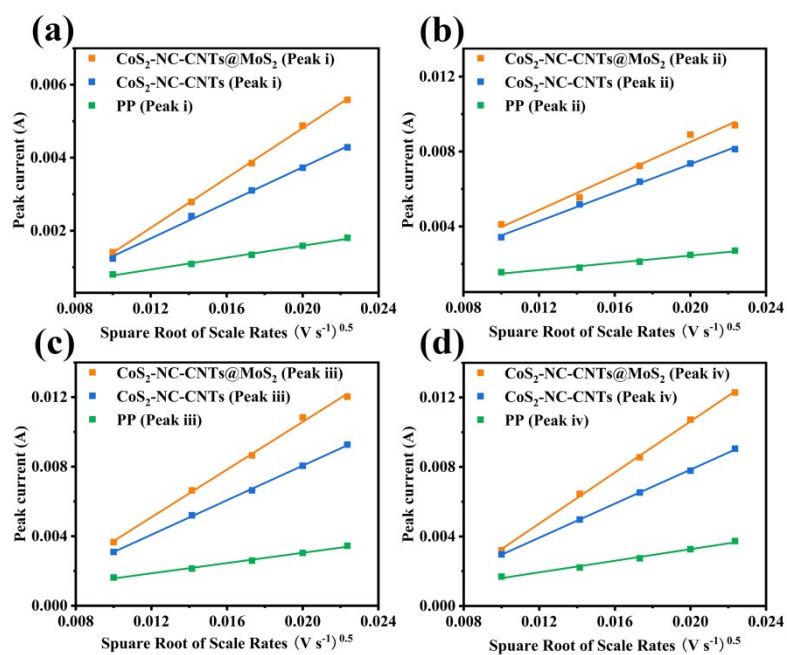

**Fig. S6.** (a–d) Linear relationship between peak current and the square root of the scan rates of four reduction peaks (Peak i, ii, iii and iv).

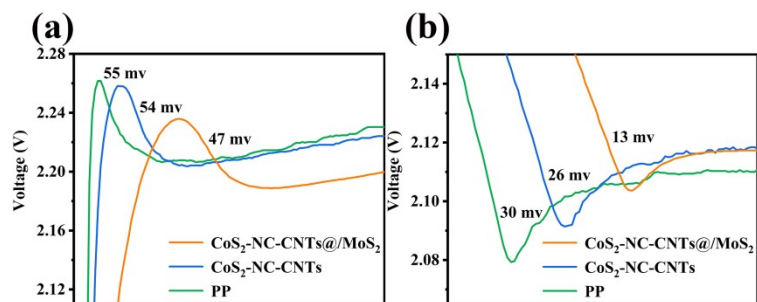

**Fig. S7.** Magnification of the initial charge–discharge curves of the batteries with different separators.

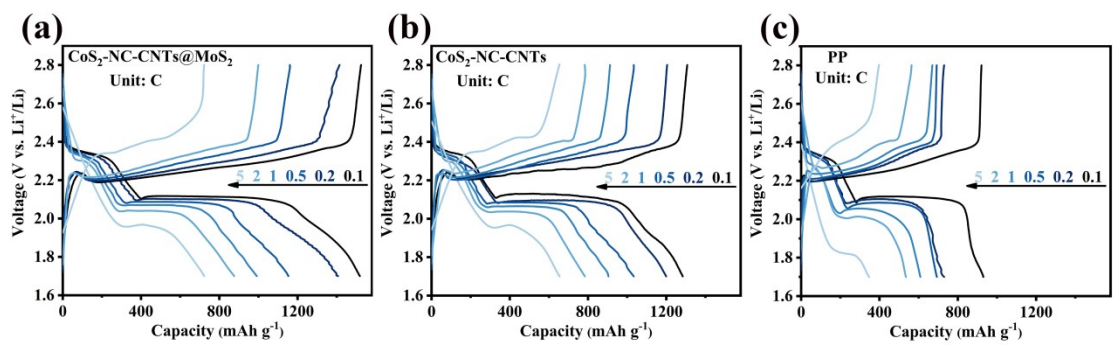

**Fig. S8.** Initial GCD curves of the CoS<sub>2</sub>-NC-CNTs@MoS<sub>2</sub>-PP, CoS<sub>2</sub>-NC-CNTs-PP and PP cells at different current densities.

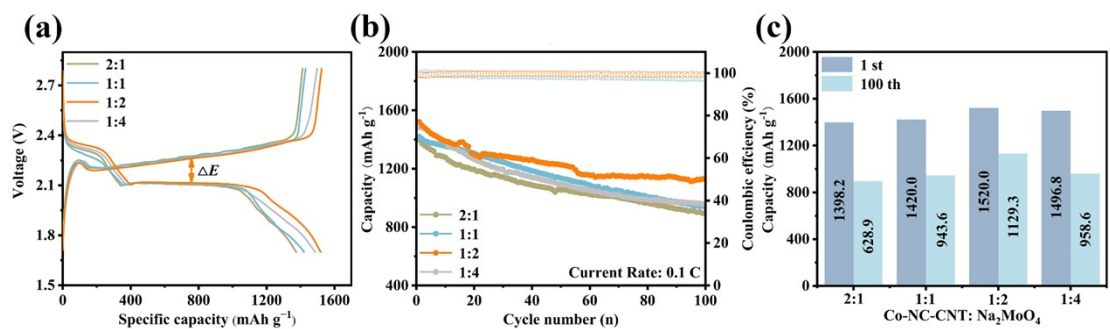

**Fig. S9.** (a) Initial GCD curves, (b) Cycling performance and (c) The first and 100<sup>th</sup> cycles of CoS<sub>2</sub>-NC-CNTs@MoS<sub>2</sub>-PP cells (with different ratio) at 0.1 C.

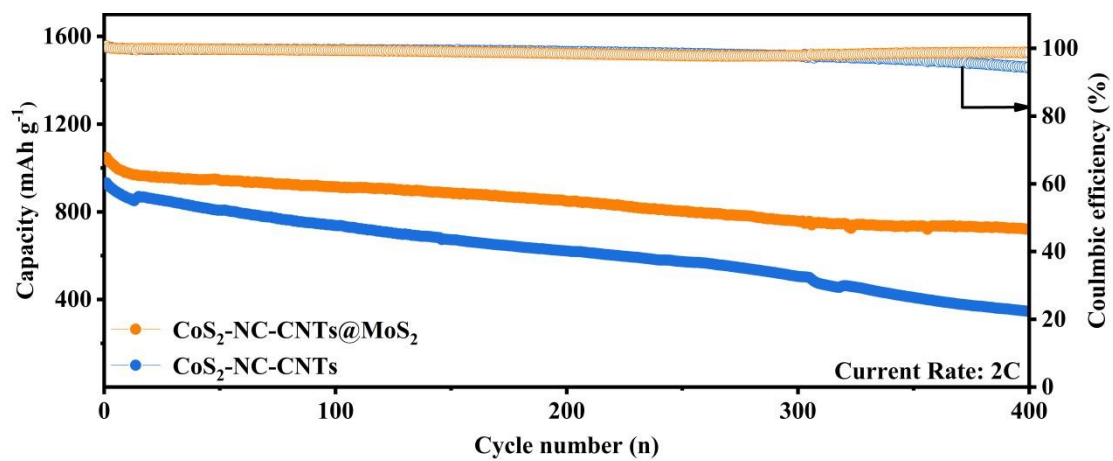

**Fig. S10.** Cycling performance of CoS<sub>2</sub>-NC-CNTs@MoS<sub>2</sub>-PP and CoS<sub>2</sub>-NC-CNTs-PP cells at 2 C.

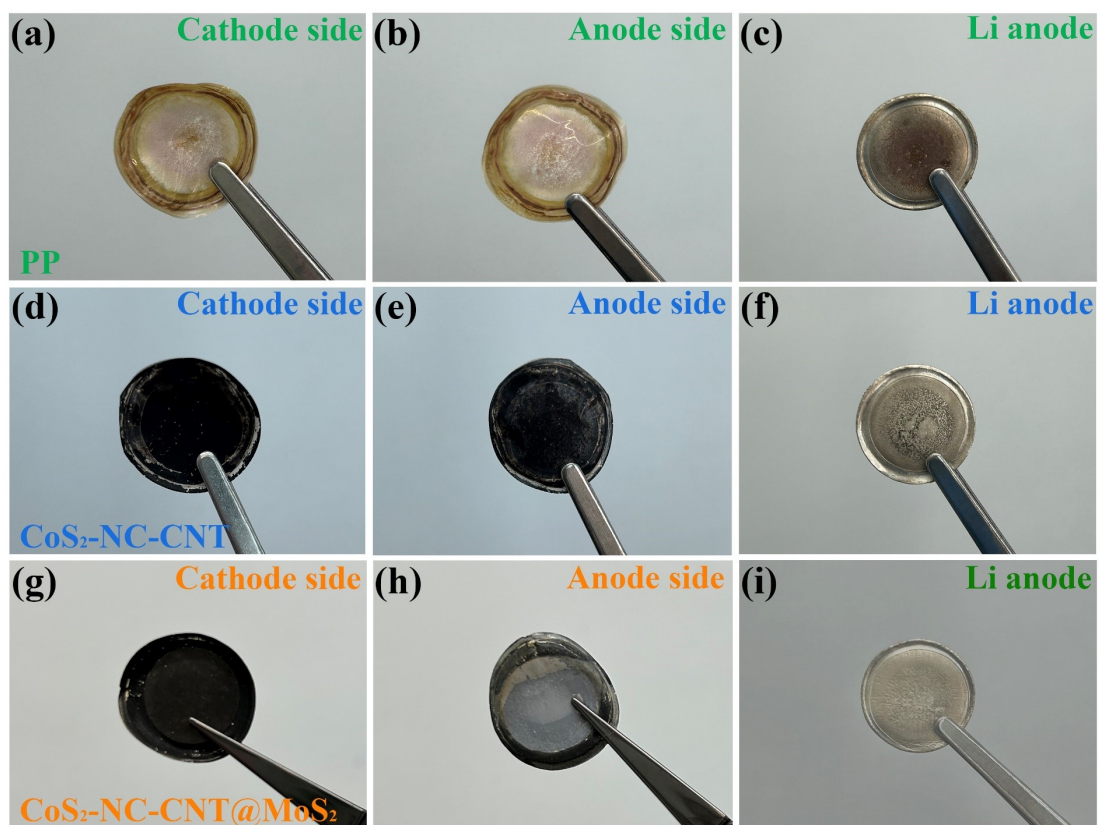

**Fig. S11.** Optical images of Li-S battery after cycling with different separators and Li anodes: (a–c) PP, (d–f)  $\text{CoS}_2\text{-NC-CNTs-PP}$  and (g–i)  $\text{CoS}_2\text{-NC-CNTs}@MoS_2\text{-PP}$  separators.



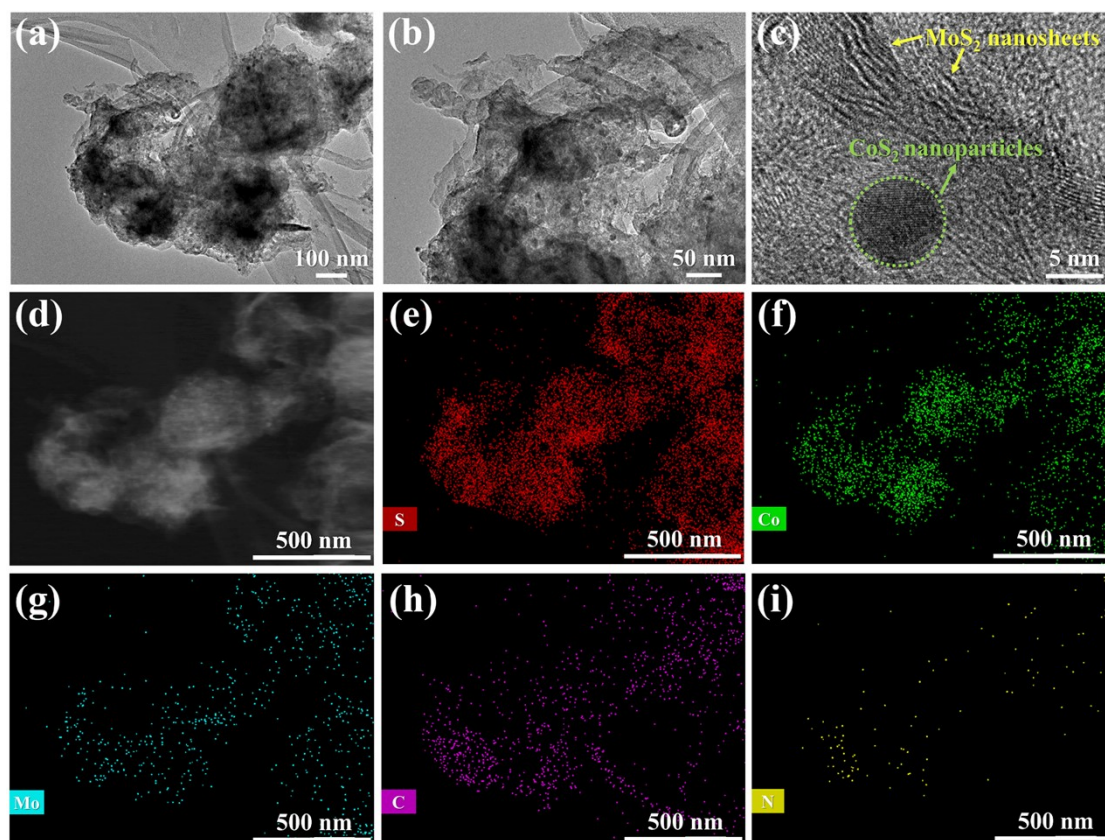

**Fig. S12.** (a–c) TEM and HR TEM images (d–i) HAADF-STEM and elemental mapping images of the CoS<sub>2</sub>-NC-CNTs@MoS<sub>2</sub> after cycling.

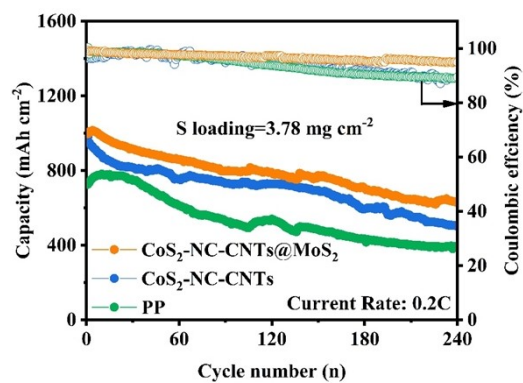

**Fig. S13.** Cyclic performance of the CoS<sub>2</sub>-NC-CNTs@MoS<sub>2</sub>-PP, CoS<sub>2</sub>-NC-CNTs-PP and PP cells at 0.2 C with a mass loading of 3.78 mg cm<sup>-2</sup> of sulfur cathodes.

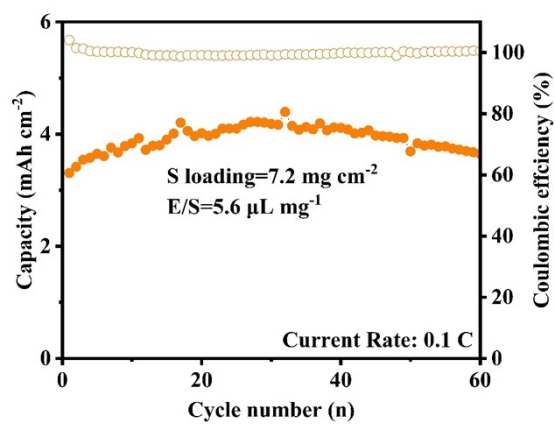

**Fig. S14.** Cycling performance of the CoS<sub>2</sub>-NC-CNTs@MoS<sub>2</sub>-PP separator battery under high sulfur load at 0.1 C.

**Eqn. S1.** The detailed calculation scheme for the lithium-ion diffusion rate.

The obtained CV curves can be used to calculate  $D_{Li^+}$  from the Randles-Sevcik equation:

$$I_p = (2.65 \times 10^5) n^{1.5} A D_{Li^+}^{0.5} C_{Li} v^{0.5} \quad (1)$$

where the peak current ( $I_p$ ) of the CV curves are fitted for various scan rates and the square root of different scan rates ( $v^{0.5}$ ). The slope of  $I_p \sim v^{0.5}$  is positively correlated with  $D_{Li^+}$ .

**Eqn. S2.** Detailed calculation scheme of the relative activation energy.

CV tests were performed at a scan rate ( $0.1 \text{ mV s}^{-1}$ ) as shown in Fig. 5a.

Correspondingly, the relationship between the electrode potential and the activation energy over the different batteries can be calculated according to the equation:

$$E_a = E_a^0 + \alpha z F \varphi_{\text{cathode}}(\text{Ox}|\text{Red})_{\text{IR}} \quad (2)$$

where  $E_a$  is the activation energy of the reduction process,  $E_a^0$  is the intrinsic activation energy,  $\alpha$  is the symmetry coefficient,  $z$  is the number of charge transferred,  $F$  is the Faraday's constant, and  $\varphi_{\text{cathode}}(\text{Ox}|\text{Red})_{\text{IR}}$  is the irreversible potential during cycling.

Tafel curve calculation formula:

$$\eta_{\text{cathode}} = \frac{RT}{\alpha z F} \ln j_0 - \frac{RT}{\alpha z F} \ln j_{\text{cathode}} \quad (3)$$

where  $\eta_{\text{cathode}}$  is the overpotential of the cathode,  $j_0$  is the exchange current density, and  $j_{\text{cathode}}$  is the current at the cathode. The equation can be written in a more concise form:

$$\eta_{\text{cathode}} = a + b \ln j_{\text{cathode}} \quad (4)$$

$$b = - \frac{RT}{\alpha z F} \quad (5)$$

where  $a$  is the intercept of the Tafel curve, and  $b$  is the slope of the Tafel curve.

Therefore, the equation (2) can be written as:

$$E_a = E_a^0 - \frac{RT}{b} \varphi_{\text{cathode}}(\text{Ox}|\text{Red})_{\text{IR}} \quad (6)$$

Based on the intercept and slope of the Tafel curve in Figs. 5b–d, the activation energy during the discharge and charge process can be calculated.

The activation energy corresponding to the reduction of  $\text{S}_8$  to the  $\text{Li}_2\text{S}_n$ :

$$\text{PP separator battery: } E_{a1} = E_a^0 - 162.1 \text{ kJ mol}^{-1}$$

$$\text{CoS}_2\text{-NC-CNTs@MoS}_2 \text{ separator battery: } E_{a1}' = E_a^0 - 189.5 \text{ kJ mol}^{-1}$$

$$\text{CoS}_2\text{-NC-CNTs separator battery: } E_{a1}'' = E_a^0 - 177.1 \text{ kJ mol}^{-1}$$

The difference in the activation energy can be calculated by subtracting the activation energy.

$$\Delta E_i = E_{a1} - E_{a1}' = (E_a^0 - 162.1) - (E_a^0 - 189.5) = 27.4 \text{ kJ mol}^{-1}$$

$$\Delta E_i' = E_{a1} - E_{a1}'' = (E_a^0 - 162.1) - (E_a^0 - 177.1) = 14.9 \text{ kJ mol}^{-1}$$

The activation energy of  $\text{Li}_2\text{S}_n$  to  $\text{Li}_2\text{S}$ :

$$\text{PP separator battery: } E_{a2} = E_a^0 - 154.9 \text{ kJ mol}^{-1}$$

$$\text{CoS}_2\text{-NC-CNTs@MoS}_2 \text{ separator battery: } E_{a2}' = E_a^0 - 193.0 \text{ kJ mol}^{-1}$$

$$\text{CoS}_2\text{-NC-CNTs separator battery: } E_{a2}'' = E_a^0 - 181.1 \text{ kJ mol}^{-1}$$

$$\Delta E_{ii} = E_{a2} - E_{a2}' = (E_a^0 - 154.9) - (E_a^0 - 193.0) = 38.1 \text{ kJ mol}^{-1}$$

$$\Delta E_{ii}' = E_{a2} - E_{a2}'' = (E_a^0 - 154.9) - (E_a^0 - 181.1) = 26.2 \text{ kJ mol}^{-1}$$

The activation energy of  $\text{Li}_2\text{S}$  to  $\text{Li}_2\text{S}_n$ :

$$\text{PP separator battery: } E_{a3} = E_a^0 - 157.4 \text{ kJ mol}^{-1}$$

$$\text{CoS}_2\text{-NC-CNTs@MoS}_2 \text{ separator battery: } E_{a3}' = E_a^0 - 307.6 \text{ kJ mol}^{-1}$$

$$\text{CoS}_2\text{-NC-CNTs separator battery: } E_{a3}'' = E_a^0 - 233.3 \text{ kJ mol}^{-1}$$

$$\Delta E_{iii} = E_{a3} - E_{a3}' = (E_a^0 - 157.4) - (E_a^0 - 307.6) = 150.2 \text{ kJ mol}^{-1}$$

$$\Delta E_{iii}' = E_{a3} - E_{a3}'' = (E_a^0 - 157.4) - (E_a^0 - 233.3) = 75.9 \text{ kJ mol}^{-1}$$

**Table S1.** Atomic ratio of the product obtained by ICP–OES

| Element | Element content/ppm | Atomic ratio |
|---------|---------------------|--------------|
| Co      | 3.857               | 1            |
| Mo      | 18.67               | 4.8          |

**Table S2.** Diffusion coefficients of  $\text{Li}^+$  ( $D_{\text{Li}^+}$ ) of  $\text{CoS}_2\text{-NC-CNTs@MoS}_2\text{-PP}$ ,  $\text{CoS}_2\text{-NC-CNTs-PP}$  and  $\text{PP}$  cells are calculated based on the Randles–Sevcik equation.

| Samples                             | $D_{\text{Li}^+}$ ( $\text{cm}^{-2} \text{s}^{-1}$ ) |                       |                       |                       |
|-------------------------------------|------------------------------------------------------|-----------------------|-----------------------|-----------------------|
|                                     | i                                                    | ii                    | iii                   | iv                    |
| $\text{CoS}_2\text{-NC-CNTs@MoS}_2$ | $2.25 \times 10^{-8}$                                | $2.99 \times 10^{-8}$ | $4.51 \times 10^{-8}$ | $4.84 \times 10^{-8}$ |
| $\text{CoS}_2\text{-NC-CNTs}$       | $1.61 \times 10^{-8}$                                | $2.51 \times 10^{-8}$ | $3.27 \times 10^{-8}$ | $3.22 \times 10^{-8}$ |
| PP                                  | $0.54 \times 10^{-8}$                                | $0.63 \times 10^{-8}$ | $0.97 \times 10^{-8}$ | $1.09 \times 10^{-8}$ |



**Table S3.** Performance comparisons of the CoS<sub>2</sub>-NC-CNTs@MoS<sub>2</sub> with representative high-performance catalysts for Li-S batteries[1-7].

| Ref. | Sample                                                | Sulfur loading (mg cm <sup>-2</sup> ) | Rate | Cycles | Initial capacity (mAh g <sup>-1</sup> ) | Capacity decay rate (%) |
|------|-------------------------------------------------------|---------------------------------------|------|--------|-----------------------------------------|-------------------------|
|      | This work                                             | 1                                     | 1    | 500    | 1079                                    | 0.076                   |
|      |                                                       |                                       | 5    | –      | 724.9                                   | –                       |
| 1    | C-MoSe <sub>2-x</sub>                                 | 1.1                                   | 1    | 500    | 854.9                                   | 0.09                    |
| 2    | DC/A<br>O-CoVSe                                       | 1                                     | 5    | –      | 683.8                                   | –                       |
| 3    | CoRu@N-CN<br>Ts                                       | 1.34                                  | 1    | 400    | 1134.2                                  | 0.09                    |
|      |                                                       |                                       | 3    | –      | 686                                     | –                       |
| 4    | Ni-Cu@C/HC                                            | 1                                     | 1    | 500    | 1202.2                                  | 0.088                   |
|      |                                                       |                                       | 2    | –      | 771.6                                   | –                       |
| 5    | Co <sub>3</sub> Fe <sub>7</sub> /Co <sub>5.47</sub> N | 1.1                                   | 1    | 500    | 1054                                    | 0.075                   |
|      |                                                       |                                       | 3    | –      | 789                                     | –                       |
| 6    | MoC NCs                                               | 1.3                                   | 1    | 600    | 946.7                                   | 0.076                   |
|      |                                                       |                                       | 5    | –      | 701                                     | –                       |
| 7    | Bi <sub>2</sub> Se <sub>3</sub>                       | 1                                     | 1    | 500    | 919.8                                   | 0.086                   |

## References

- [1] Z. Nie, F. Xu, H. Liu, H. Wang, Y. Jiao, W. Zhu, Q. Wang, Y. Yan and J. Zhu, *Chem. Eng. J.*, 2023, 481, 148433.
- [2] P. Tan, Y. Yin, D. Cai, B. Fei, C. Zhang, Q. Chen and H. Zhan, *J. Mater. Chem. A*, 2024, DOI: 10.1039/D3TA07189H.
- [3] P. Xia, S. Li, L. Yuan, S. Jing, X. Peng, S. Lu, Y. Zhan and H. Fan, *J. Membr. Sci.*, 2024, 694, 122395.
- [4] B. Zhang, J. Qie, W. Wang, Y. Li, Y. Cao, Y. Mao, J. You, C. Li and Z. Xu, *Chem. Eng. J.*, 2024, 480, 148022.
- [5] P. Wan, X. Peng, S. Dong, X. Liu, S. Lu, Y. Zhang and H. Fan, *J. Colloid Interface Sci.*, 2024, 657, 757-766
- [6] X. Zhang, M. Lei, S. Tian, J. Wang, *Rare Met.*, 2023, 1-11.
- [7] M. Zhao, J. Fu, D. Cai, C. Zhang, B. Fei, Y. Zhang, B. Sa, Q. Chena and H. Zhan, *J. Mater. Chem. A*, 2023, 11, 24089
